# Supplementary material for: A Standardized Lindera obtusiloba Extract Improves Endothelial Dysfunction and Attenuates Plaque Development in Hyperlipidemic ApoE-Knockout Mice
Source: MDPI journal article supplement (doi:10.3390/plants10112493), 2021-11-18
Supplement: s1 [file s1]

## Supplementary Figure S1

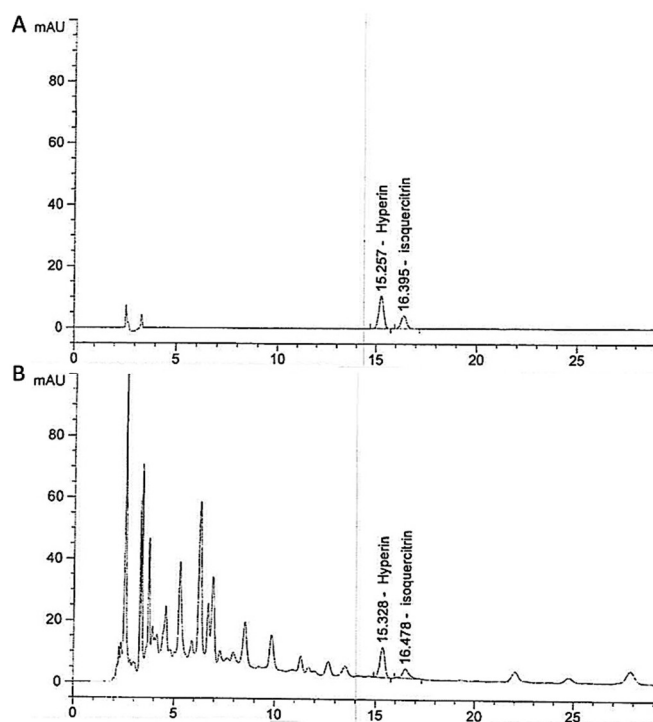

Supplementary Figure S1. Representative HPLC chromatograms of hyperin and isoquercitrin (A) and LOE (B) under conditions described in the Materials and Methods section. Peaks for hyperin and isoquercitrin are indicated.
